# Supplementary material for: Bi-functional properties of Fe3O4@YPO4:Eu hybrid nanoparticles: hyperthermia application
Source: Royal Society of Chemistry journal article supplement (doi:10.1039/c2dt32508j), 2012-12-21
Supplement: c2dt32508j.pdf [file c2dt32508j.pdf]

## Electronic supplementary information (ESI)

### Bi-functional Properties of $\text{Fe}_3\text{O}_4@\text{YPO}_4:\text{Eu}$ Hybrid Nanoparticles: Hyperthermia Application

A. I. Prasad,<sup>a</sup> A. K. Parchur,<sup>b</sup> R. R. Juluri,<sup>c</sup> N. Jadhav,<sup>d</sup> B. N. Pandey,<sup>d</sup> R. S. Ningthoujam<sup>a,\*</sup>  
and R. K. Vatsa<sup>a</sup>

<sup>a</sup>Chemistry Division, Bhabha Atomic Research Centre, Mumbai-400 085, India

<sup>b</sup>Department of Physics, Banaras Hindu University, Varanasi-221 005, India

<sup>c</sup>Institute of Physics, Sachivalaya Marg, Bhubaneswar-751005, India

<sup>d</sup>Radiation Biology and Health Sciences Division, Bhabha Atomic Research Centre, Mumbai-400 085, India

\* Authors to whom correspondence should be addressed

E-mail: rsn@barc.gov.in (R. S. Ningthoujam)

Phone: +91-22-25529321 and Fax: +91-22-25505151

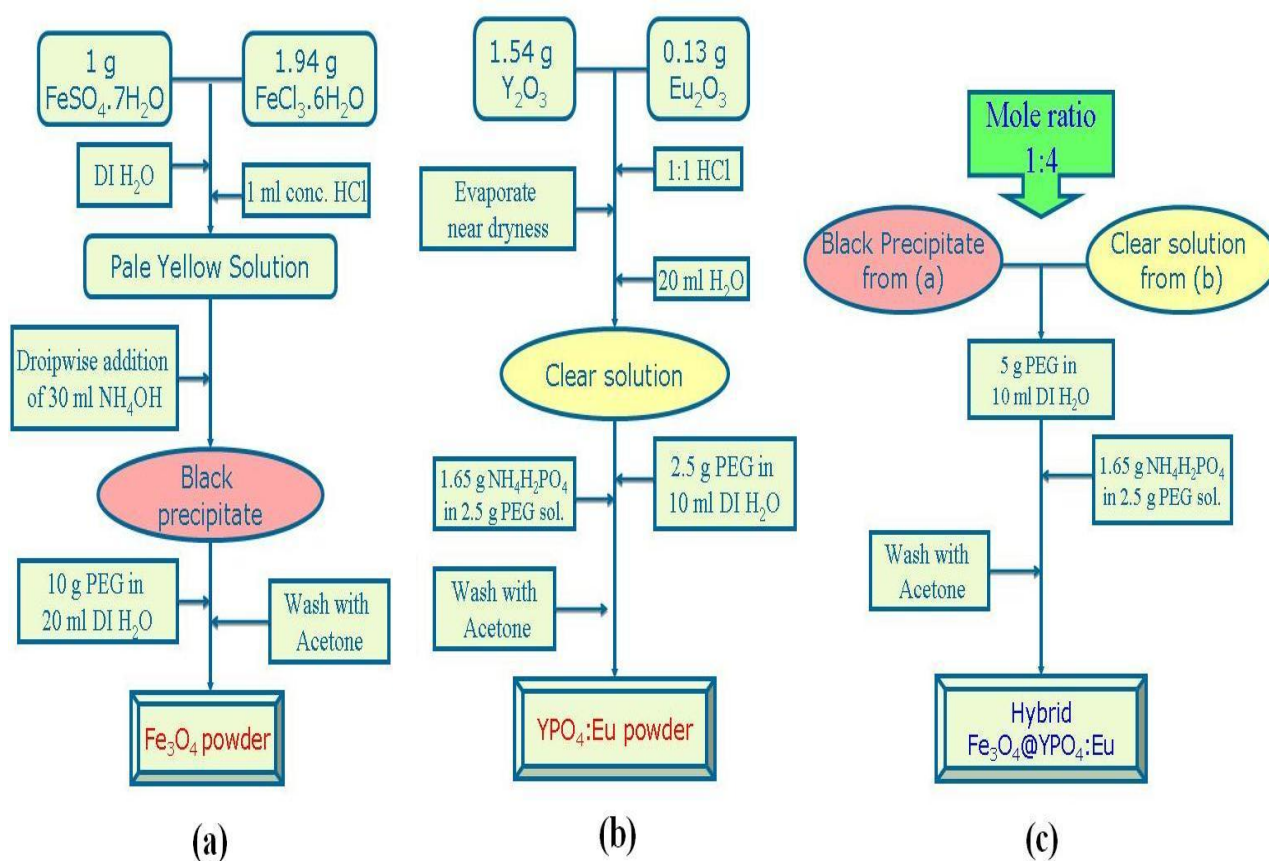

**Figure S1.** Schematic representation of the processing steps in preparation of (a)  $\text{Fe}_3\text{O}_4$ , (b)  $\text{YPO}_4:\text{Eu}$  and (c)  $\text{Fe}_3\text{O}_4@\text{YPO}_4:\text{Eu}$ .

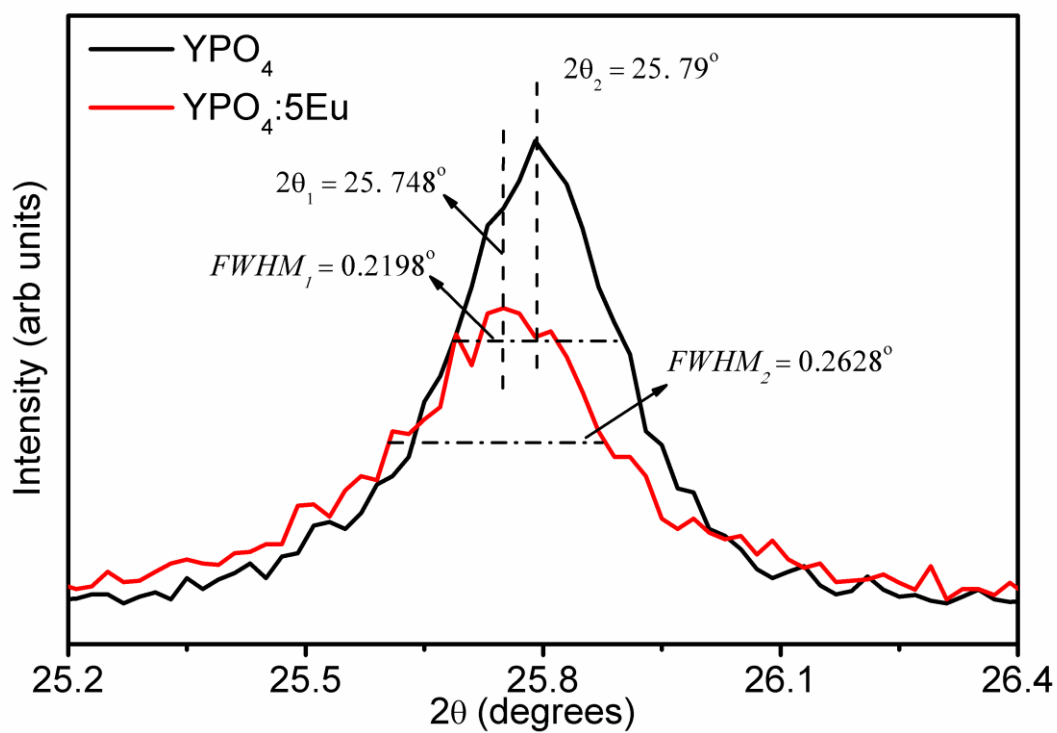

**Figure S2.** Change in peak position of (200) plane with and without 5 at.%  $\text{Eu}^{3+}$  doping in  $\text{YPO}_4$  host.

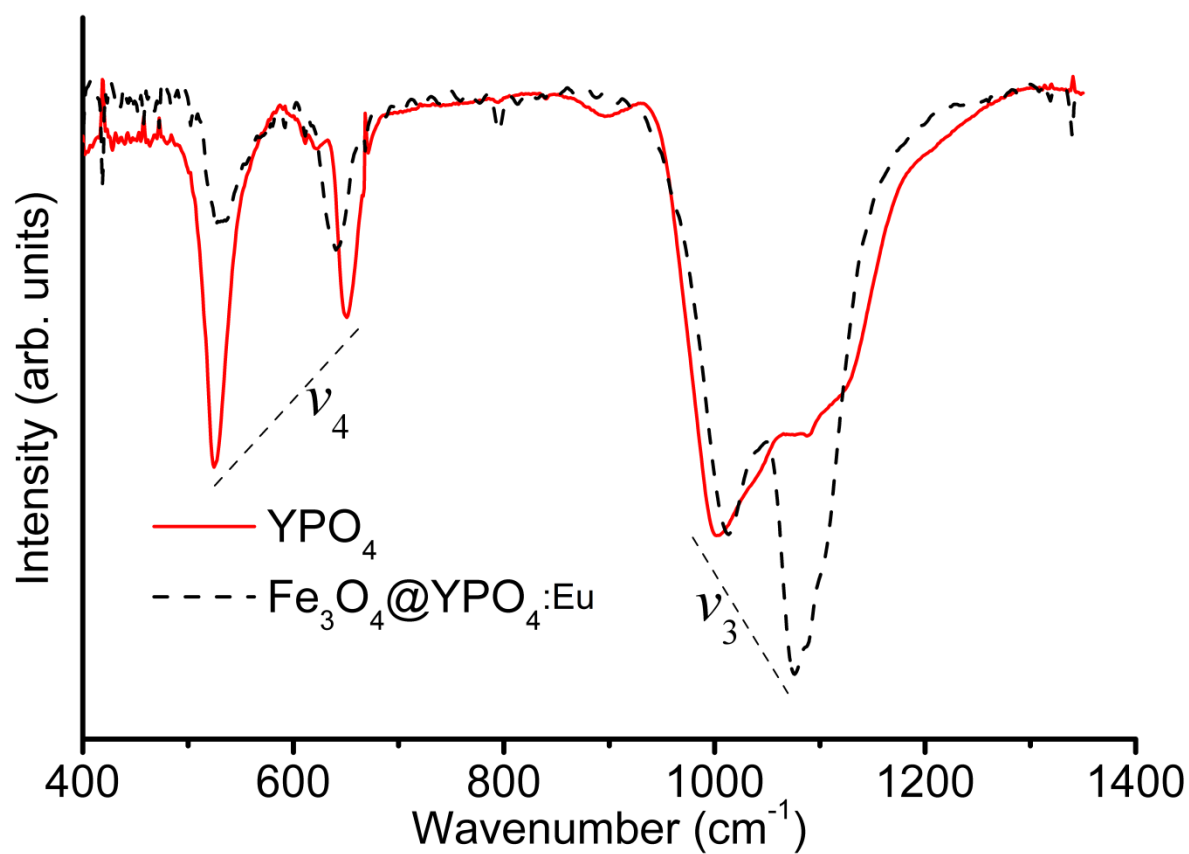

**Figure S3.** Comparison of peaks corresponding to PO<sub>4</sub> group in FTIR spectra of YPO<sub>4</sub>:Eu and Fe<sub>3</sub>O<sub>4</sub>@YPO<sub>4</sub>:5Eu nanoparticles (400-1400 cm<sup>-1</sup>) after background correction.
